# Supplementary material for: Rapid identification of molecular changes in tulsi (Ocimum sanctum Linn) upon ageing using leaf spray ionization mass spectrometry
Source: Royal Society of Chemistry journal article supplement (doi:10.1039/c2an35655d), 2012-01-01
Supplement: c2an35655d.pdf [file c2an35655d.pdf]

## Supporting Information

### Rapid Identification of Molecular Changes in Tulsi (*Ocimum sanctum* Linn) Upon Ageing Using Leaf Spray Ionization Mass Spectrometry

Depanjan Sarkar, Amitava Srimany and T. Pradeep\*

DST Unit of Nanoscience (DST UNS), Department of Chemistry, Indian Institute of Technology Madras, Chennai 600036, India.

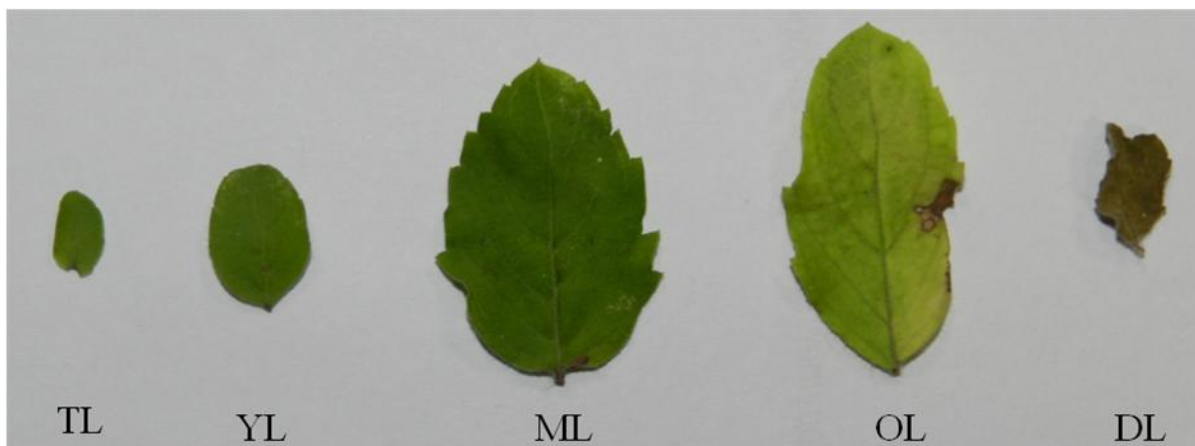

**Figure S1.** Five different categories of Tulsi leaves: (from left to right) tender leaf (TL), young leaf (YL), mature leaf (ML), old leaf (OL) and dried leaf (DL).

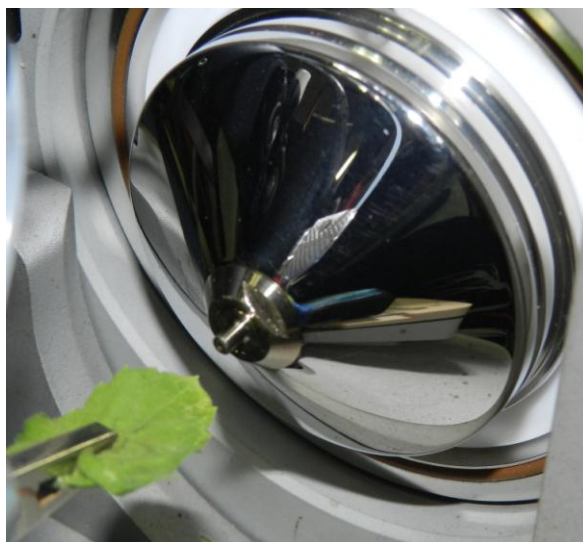

**Figure S2.** Experimental set-up for the leaf spray ionization showing the Tulsi leaf connected with a clip and held in front of atmospheric inlet of the mass spectrometer.

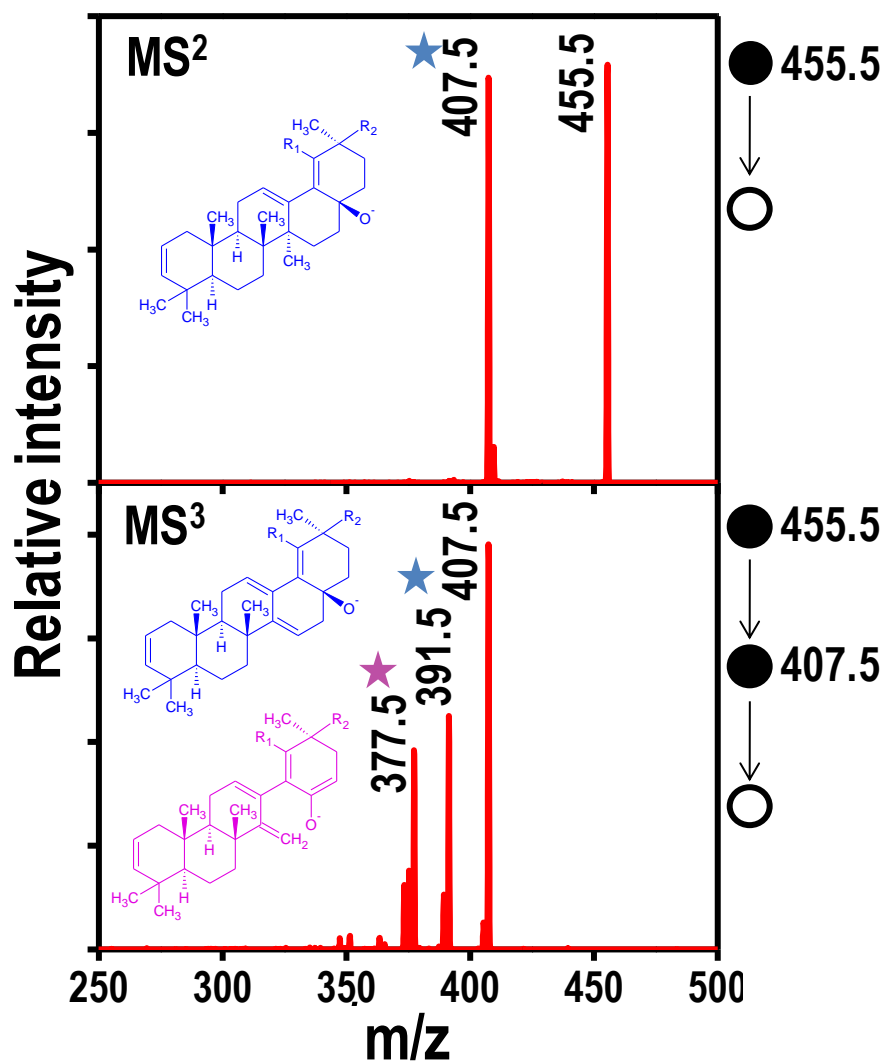

**Figure S3.** Tandem mass spectra for the peak at  $m/z$  455.5. Possible structures of fragment ions at  $m/z$  407.5,  $m/z$  391.5 and  $m/z$  377.5 have been incorporated. When  $R_1=H$  and  $R_2=CH_3$ , the structures are coming from oleanolic acid fragmentations and when  $R_1=CH_3$  and  $R_2=H$ , the structures are coming from ursolic acid fragmentations. Right side schematics show the parent ions from which fragmentations have been done.

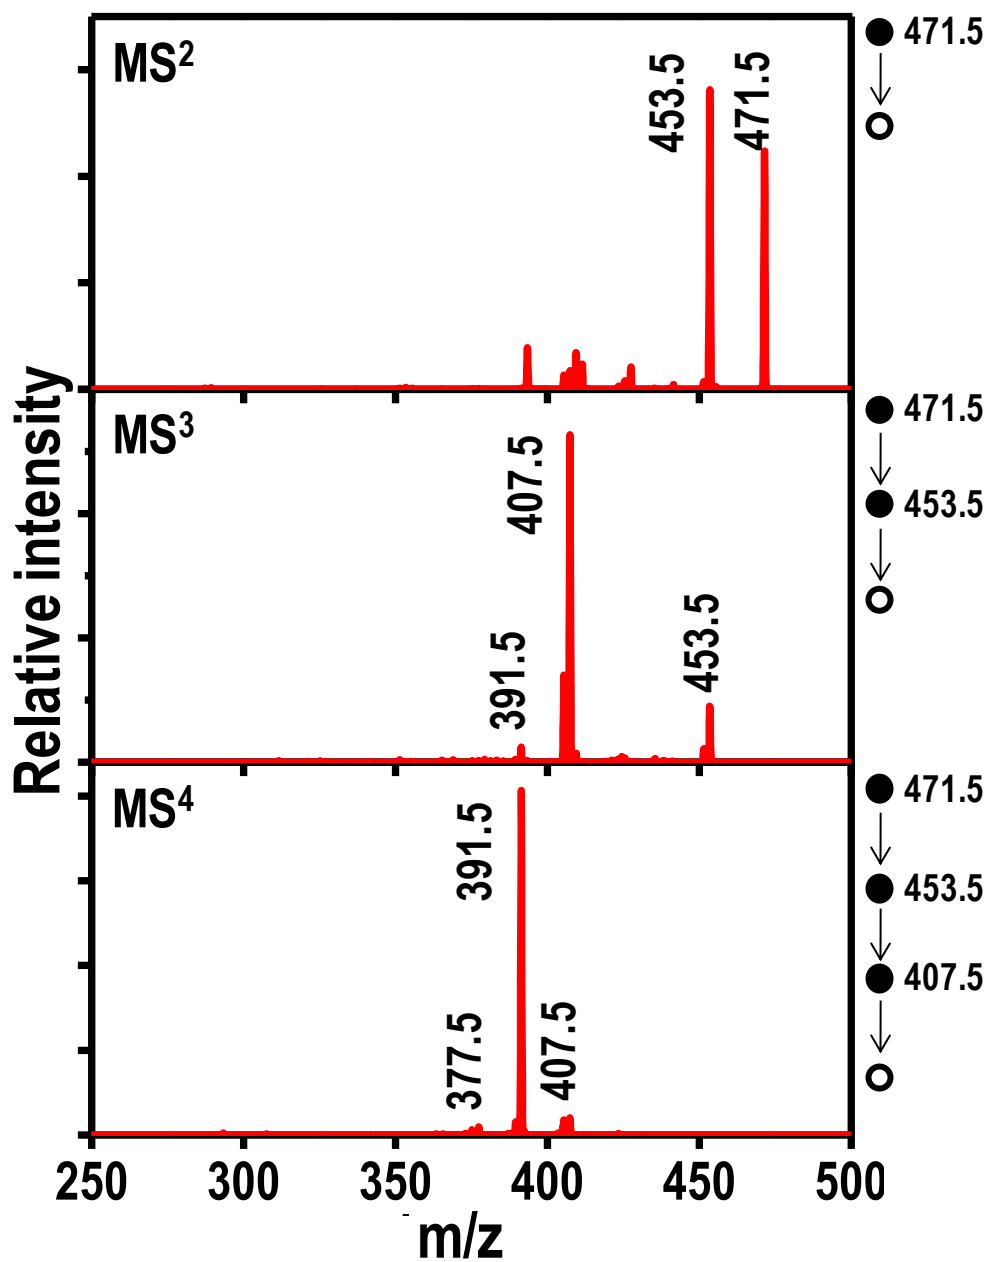

**Figure S4.** Tandem mass spectra for the peak at  $m/z$  471.5. Right side schematics show the parent ions from which fragmentations have been done.

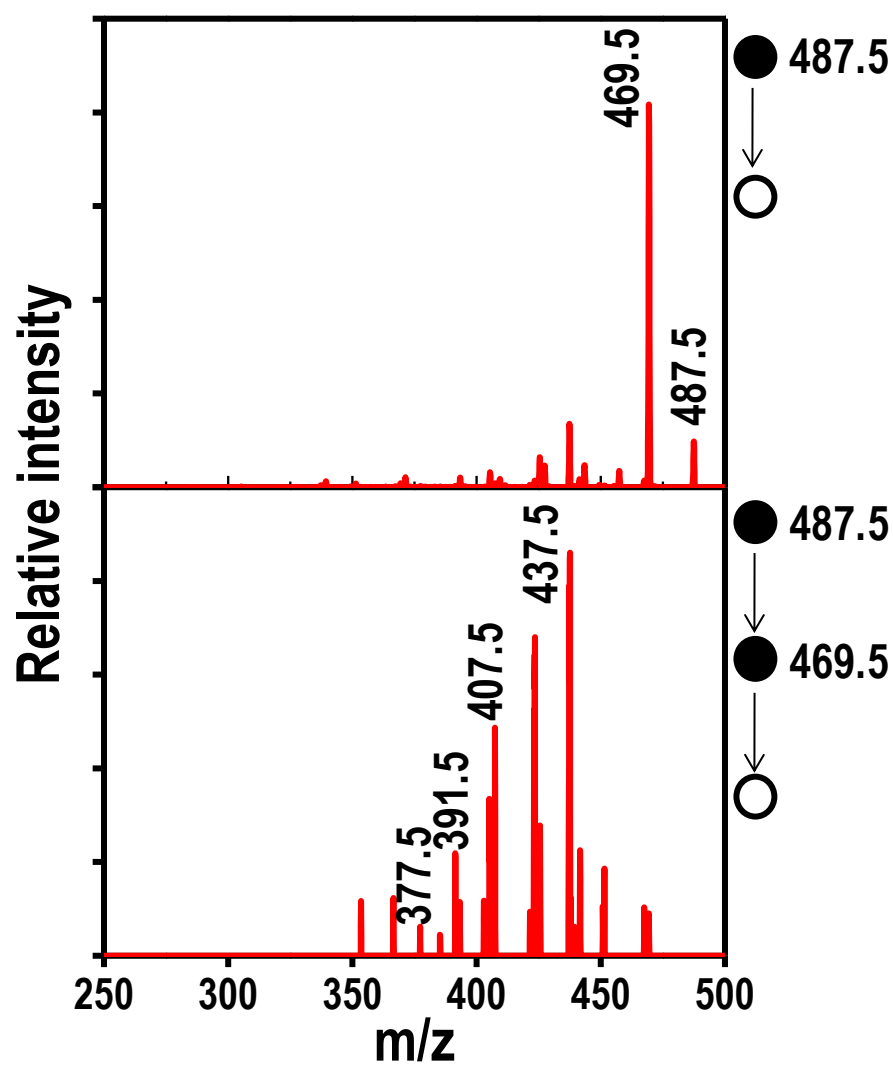

**Figure S5.** Tandem mass spectra for the peak at  $m/z$  487.5. Right side schematics show the parent ions from which fragmentations have been done.

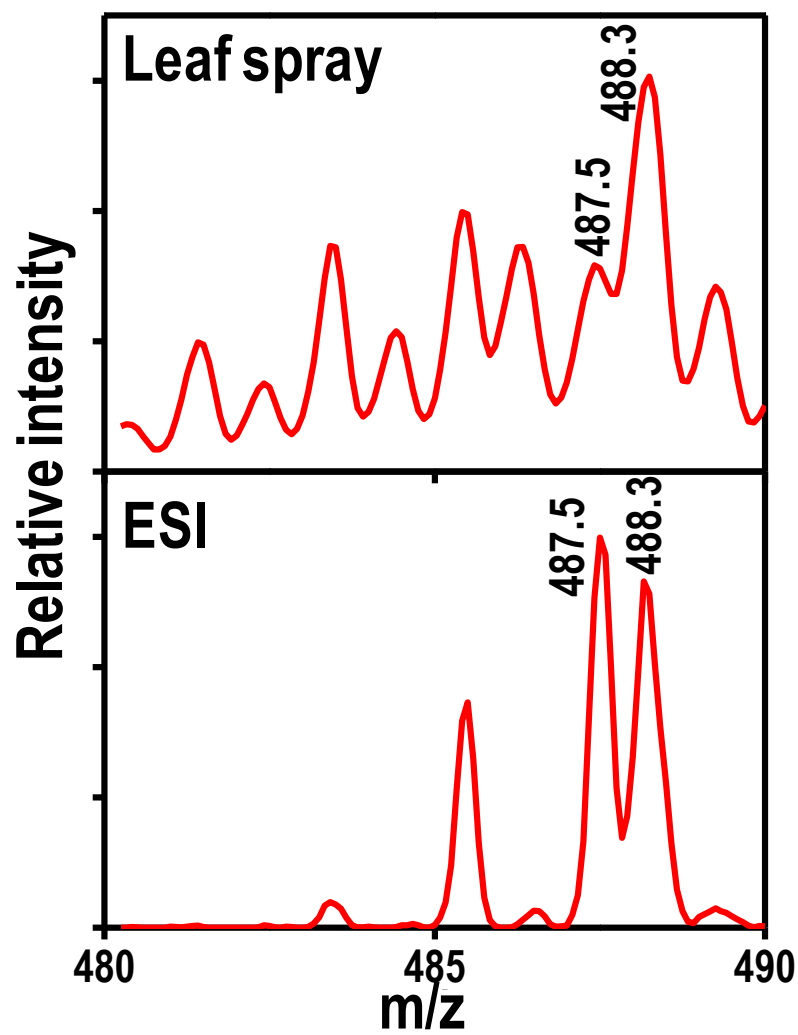

**Figure S6.** Expanded view of leaf spray (top) and ESI (bottom) spectra near the region at  $m/z$  487.5.

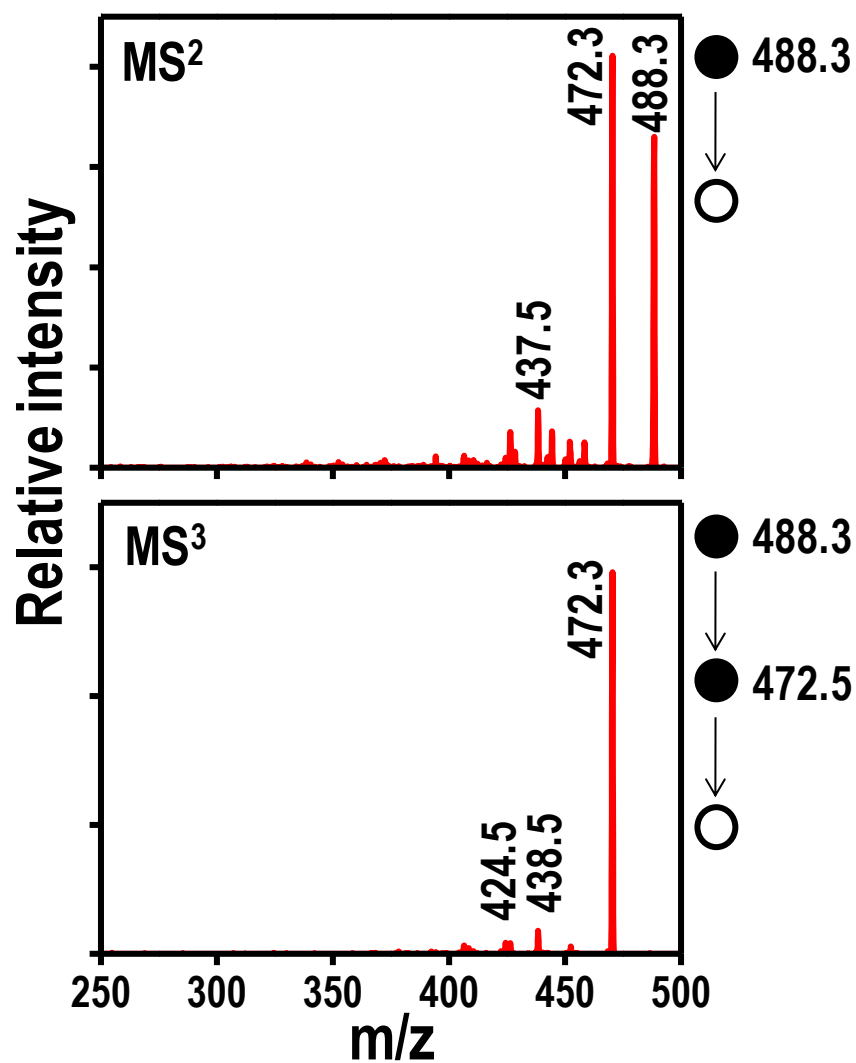

**Figure S7.** Tandem mass spectra for the peak at  $m/z$  488.3. Right side schematics show the parent ions from which fragmentations have been done.
